# Supplementary material for: Assessment of the Efficacy, Safety, and Effectiveness of Weight Control and Obesity Management Mobile Health Interventions: Systematic Review
Source: PubMed Central journal article supplement (PMC6913727; doi:10.2196/12612), 2019-10-25
Supplement: mhealth_v7i10e12612_app1.pdf [file mhealth_v7i10e12612_app1.pdf]

# Search Strategy: Obesity and overweight management mhealth apps

## PubMed

[\(\(app OR application\)\) AND \(\(\(mHealth OR eHealth\)\) AND \(overweight OR obesity\)\) AND \(Efficacy OR security OR safety OR effectiveness OR evaluation\)\)](#)

## Scopus

[TITLE-ABS-KEY \(\(\( app OR application \)\) AND \(\(\( mhealth OR ehealth \)\) AND \( overweight OR obesity \)\) AND \( efficacy OR security OR safety OR effectiveness OR evaluation \)\)\)](#)

## PsycINFO (APA)

Any Field : ( ( app OR Any Field : application ) ) AND Any Field : ( ( ( mHealth OR Any Field : eHealth ) ) AND Any Field : ( overweight OR Any Field : obesity ) ) AND Any Field : ( Efficacy OR Any Field : security OR Any Field : safety OR Any Field : effectiveness OR Any Field : evaluation ) )

## ClinicalTrials.gov

[\(\(app OR application\)\) AND \(\(\(mHealth OR eHealth\)\) AND \(overweight OR obesity\)\) AND \(Efficacy OR security OR safety OR effectiveness OR evaluation\)\)](#)

## Cochrane Central Register of Controlled Trials (CENTRAL)

(app or application) and (((mHealth or eHealth) and (overweight or obesity)) and (Efficacy or security or safety or effectiveness or evaluation))

## Clinicaltrialsregister.eu

[overweight AND health](#)

## UK tripdatabase

[\(app or application\) and \(\(\(mHealth or eHealth\) and \(overweight or obesity\)\) and \(Efficacy or security or safety or effectiveness or evaluation\)\)](#)
