# Supplementary material for: Assessment of the Efficacy, Safety, and Effectiveness of Weight Control and Obesity Management Mobile Health Interventions: Systematic Review
Source: PubMed Central journal article supplement (PMC6913727; doi:10.2196/12612), 2019-10-25
Supplement: mhealth_v7i10e12612_app3.pdf [file mhealth_v7i10e12612_app3.pdf]

### Multimedia Appendix 3: Characteristics of the selected studies

| Reference        | Design (N)                           | Country                             | Population                                                                                                                 | Intervention                                                              | Quality  | Limitations                                                                                               |
|------------------|--------------------------------------|-------------------------------------|----------------------------------------------------------------------------------------------------------------------------|---------------------------------------------------------------------------|----------|-----------------------------------------------------------------------------------------------------------|
| Lee 2010 [23]    | CT <sup>a</sup><br>(2 groups, 36)    | The United States and Latin America | Sex: No Inf <sup>b</sup><br>Age: 28.2 (i) <sup>c</sup><br>29.5 (c) <sup>d</sup><br>BMI <sup>e</sup> : 22.2 (i)<br>22.3 (c) | Efficacy of the SmartDiet app (6 weeks)                                   | Moderate | No specifications about control conditions or randomization method.                                       |
| Carter 2013 [24] | RCT <sup>f</sup><br>(3 groups, 128)  | The United Kingdom                  | Sex: 77% women<br>Age: 42 (SD 9)<br>BMI: 34 (SD 5)                                                                         | Efficacy in weight management intervention by My Meal Mate app (6 months) | Low      | Selection bias: motivated volunteers, different educational level according to randomization.             |
| Thomas 2013 [25] | Single-arm pre-post<br>(1 group, 20) | The United States                   | Sex: 95% women<br>Age: 53 (SD 1.9)<br>BMI: 36.3 (SD 1.2)                                                                   | Efficacy of Daily Burn + Health-E-call app (24 weeks)                     | Low      | Small sample size.<br>Short-term effects (24 weeks).<br>No control group.<br>Potential motivational bias. |
| Bond 2014 [26]   | Single-arm pre-post<br>(1 group, 30) | The United States                   | Sex: 83% women<br>Age: 47.5 (SD 13.5)<br>BMI: 36.2 (SD 7.5)                                                                | Efficacy of B-MOBILE app to reduce time spent in sedentary                | Low      | Small sample size.<br>Selection bias: volunteers.<br>Possible misclassification of sedentary              |

|                       |                     |                   |                                                                                       |                                                                           |          |                                                                                                                  |
|-----------------------|---------------------|-------------------|---------------------------------------------------------------------------------------|---------------------------------------------------------------------------|----------|------------------------------------------------------------------------------------------------------------------|
|                       |                     |                   |                                                                                       | behavior (4 weeks)                                                        |          | behavior by the armband sensor.                                                                                  |
| Nollen 2014 [27]      | RCT (2 groups, 51)  | The United States | Sex: women<br>Age: 11.3 (SD 1.6)<br>BMI: 23.7 (SD 5.7)<br>Low-income, ethnic minority | Efficacy of MyPal A626 behavioral change in weight control (12 weeks)     | Moderate | Small sample size.<br>Too short to appreciate behavioral change.                                                 |
| Block 2015 [28]       | RCT (2 groups, 339) | The United States | Sex: 31.27% woman.<br>Age: 55 (SD 8.9)<br>BMI: 31.2 (SD 4.4)<br>Prediabetic patients  | Efficacy of Alive-PD that provides tailored behavioral support (6 months) | High     | Potential selection bias: study participants were relatively well educated and mainly non-Hispanic white people. |
| Finkelstein 2015 [29] | RCT (2 groups, 30)  | The United States | Sex: all women<br>Age: 52 (SD 12)<br>BMI: 37 (SD 6)                                   | Efficacy of mHealth intervention to increase PA (8 weeks)                 | Moderate | No information about recruitment.<br>Randomized crossover design study.                                          |
| Fukuoka 2015 [30]     | RCT (2 groups, 61)  | The United States | Sex: 77% women<br>Age: 55.2 (SD 9.0)<br>BMI: 33.3 (SD 6.0)                            | Diabetes Prevention Program (monitoring of weight, caloric intake, and    | Moderate | Less number of participants.<br>Selection bias: participants willing to use a mobile app and a pedometer.        |

|                     |                                   |                   |                                                                                        |                                                                                                 |          |                                                                                                             |
|---------------------|-----------------------------------|-------------------|----------------------------------------------------------------------------------------|-------------------------------------------------------------------------------------------------|----------|-------------------------------------------------------------------------------------------------------------|
|                     |                                   |                   | 48% were racial/ethnic minorities. Prediabetic condition.                              | PA <sup>g</sup> ), with reduced number of face-to-face + home-based exercise program (5 months) |          |                                                                                                             |
| Martin 2015 [31]    | RCT (2 groups, 48)                | The United States | Sex: 46% women<br>Age: 58 (SD 8)<br>BMI: 31 (SD 6)<br>Patients with heart disease      | Efficacy of a mActive intervention in PA performance (5 weeks)                                  | Moderate | Limited size and scope. Different stages of the trial with different approaches when blinding participants. |
| McCarroll 2015 [32] | Single-arm pre-post (1 group, 50) | The United States | Sex: women<br>Age: 58.4 (SD 10.3)<br>BMI: 34.9 (SD 8.7)<br>Overweight cancer survivors | Efficacy of nutrition and exercise counseling through Loose It app (1 month)                    | Low      | Small sample size. Noncontrolled single-arm trial. Low completion rate (70%).                               |
| Oh 2015 [33]        | RCT (2 groups, 422)               | Korea             | Sex: 46.7% (i) and 51.4% (c) women.<br>Age: 46.78 (i) 50.35 (c)                        | Efficacy of SmartCare services in obese patients with                                           | High     | Potential selection bias: higher educated participants were assigned to the intervention                    |

|                                |                                   |           |                                                                            |                                                                                                                      |      |                                                                                                                                                                               |
|--------------------------------|-----------------------------------|-----------|----------------------------------------------------------------------------|----------------------------------------------------------------------------------------------------------------------|------|-------------------------------------------------------------------------------------------------------------------------------------------------------------------------------|
|                                |                                   |           | BMI: 29.42 (SD 3.53)<br>(i)<br>29.40 (SD 3.39) (c)                         | metabolic syndrome. Safety was also assessed (24 weeks)                                                              |      | group despite random selection.                                                                                                                                               |
| Partridge 2015 [34], 2016 [35] | RCT (2 groups, 214)               | Australia | Sex: 61% women<br>Age: 27.7 (SD 4.9)<br>BMI: 27.1 (SD 2.5)                 | Efficacy and engagement with the mHealth program components of TXT2BFiT intervention (3 months + 6 follow-up months) | High | Results might have been biased since the sample was mostly well educated and from high socioeconomic areas.                                                                   |
| Pretlow 2015 [36]              | Single-arm pre-post (1 group, 43) | Australia | Sex: 65% women<br>Age: 16 (SD 0.43)<br>BMI: 0.98 (SD 0.0) mean percentile. | Efficacy of mHealth intervention for weight loss based on an addiction treatment approach (20 weeks)                 | Low  | Small sample size. Noncontrolled study. Selection bias: participants were selected if motivated; economic compensation proportional to completion. Low completion rate (63%). |

|                              |                                                          |                         |                                                                                                            |                                                                                                          |      |                                                                                                                                                        |
|------------------------------|----------------------------------------------------------|-------------------------|------------------------------------------------------------------------------------------------------------|----------------------------------------------------------------------------------------------------------|------|--------------------------------------------------------------------------------------------------------------------------------------------------------|
| Naimark<br>2015 [37]         | RCT<br>(2 groups,<br>85)                                 | Israel                  | Sex: 54%<br>women<br>Age: 47.9<br>(SD 12.3)<br>BMI: 26.2<br>(SD 3.9)                                       | Efficacy of<br>Web-based<br>eBalance<br>app for<br>healthy<br>people (14<br>weeks)                       | High | Good retention<br>rate in both<br>control and<br>intervention<br>group.<br>Short length of<br>the intervention.                                        |
| Spook<br>2015 [38]           | Cluster<br>randomiza<br>tion trial<br>(2 groups,<br>501) | The<br>Netherla<br>nds  | Sex: 62.8%<br>woman.<br>Age: 17.28<br>(SD 1.3)<br>BMI: 21.1<br>(SD 3.3)<br>Secondary<br>school<br>students | Efficacy of<br>Balance It,<br>serious self-<br>regulation<br>game<br>intervention<br>(4 weeks)           | Low  | Very high<br>dropout rates<br>(72.4%).<br>Cluster<br>randomized trial<br>at school level.<br>Short-term<br>intervention.<br>Self-reported<br>outcomes. |
| Svetkey<br>2015 [39]         | RCT<br>(3 groups,<br>365)                                | The<br>United<br>States | Sex: 69.6%<br>women<br>Age<br>(mean):<br>29.4<br>BMI<br>(mean):<br>35.2                                    | Efficacy of<br>app or<br>professional<br>coach<br>intervention<br>to lose<br>weight (24<br>months)       | High | No important<br>limitations.                                                                                                                           |
| Aschbrenn<br>er 2016<br>[40] | Single-<br>arm pre-<br>post<br>(1 group,<br>32)          | The<br>United<br>States | Sex: 56%<br>women<br>Age: 48.8<br>(SD 11.9)<br>BMI: 37.7<br>(SD 7.9)<br>Patients<br>with serious           | Efficacy of<br>lifestyle<br>change<br>intervention<br>(apps +<br>wearable +<br>Facebook)<br>to reinforce | Low  | Noncontrolled<br>single-arm study.<br>Small sample<br>size.                                                                                            |

|                      |                                   |                   |                                                                                    |                                                                                                                      |     |                                                                                                      |
|----------------------|-----------------------------------|-------------------|------------------------------------------------------------------------------------|----------------------------------------------------------------------------------------------------------------------|-----|------------------------------------------------------------------------------------------------------|
|                      |                                   |                   | mental illness.                                                                    | PA and healthy eating (24 weeks)                                                                                     |     |                                                                                                      |
| Hutchesson 2016 [41] | Single-arm pre-post (1 group, 18) | Australia         | Sex: all women<br>Age: 22.8 (SD 3.2)<br>BMI: 27.3 (SD 1.6)                         | Be positive—<br>Be health program for weight loss (3 months)                                                         | Low | Single-arm study, noncontrolled.<br>Nonprobabilistic selection of participants.<br>Small sample.     |
| Jensen 2016 [42]     | Single-arm pre-post (1 group, 16) | The United States | Sex: 75% women<br>Age: 14.29 (SD 1.1)<br>BMI: 1.85 (SD 0.1)                        | Efficacy of mobile phone - assisted adolescent behavioral weight control intervention with Daily Burn app (24 weeks) | Low | Small sample.<br>Heterogeneity of participants.<br>No control group.                                 |
| Lee 2016 [43]        | Single-arm pre-post (1 group, 20) | Korea             | Sex: 33% women<br>Age: 20-40<br>BMI:<br>23-25: 38.5%<br>25-30: 33.0%<br>>30: 28.5% | Develop and test efficacy of With U app and social network offline and web-based (4 weeks)                           | Low | Single-arm study, noncontrolled.<br>No information about selection of participants.<br>Small sample. |

|                            |                                   |                   |                                                                                                                                  |                                                                                                         |      |                                                                                                                    |
|----------------------------|-----------------------------------|-------------------|----------------------------------------------------------------------------------------------------------------------------------|---------------------------------------------------------------------------------------------------------|------|--------------------------------------------------------------------------------------------------------------------|
| Michaelides 2016 [44]      | Single-arm pre-post (1 group, 43) | The United States | Sex: 86% women<br>Age: 51.5 (SD 8.3)<br>BMI: 35.5 (SD 6)<br>Hyperglycemic (HbA <sub>1c</sub> <sup>h</sup> between 5.7% and 6.4%) | Efficacy of a novel mobile Diabetes Prevention Program delivery platform with human coaching (24 weeks) | Low  | No control group.<br>Small sample.                                                                                 |
| Quintiliani 2016 [45]      | Single-arm pre-post (1 group, 10) | The United States | Sex: all women<br>Age: 59 (SD 6)<br>Overweight breast cancer survivors<br>50% ethnic minority group                              | Mobile health-supported behavioral counseling intervention for weight control (10 weeks)                | Low  | Single-arm study, noncontrolled.<br>Small sample.<br>Ownership of a smartphone as well as home Wi-Fi was required. |
| Wiley 2016 [46]            | Single-arm pre-post (1 group, 10) | The United States | Sex: All women<br>Age: 43.5 (35-49)<br>BMI: 31.6 (range 27.2-36.4).                                                              | Efficacy of YouPlus Health coaching platform (12 weeks)                                                 | Low  | Single-arm study, noncontrolled.<br>Small sample.                                                                  |
| Gomez-Marcos 2017 [47] and | RCT (2 groups, 833, 415)          | Spain             | Sex: 60.0% (i)<br>64.1% (c)<br>women                                                                                             | mHealth intervention to improve the                                                                     | High | No blinding due to the nature of the intervention.                                                                 |

|                        |                                          |                   |                                                                                                     |                                                                      |      |                                                                                               |
|------------------------|------------------------------------------|-------------------|-----------------------------------------------------------------------------------------------------|----------------------------------------------------------------------|------|-----------------------------------------------------------------------------------------------|
| Garcia-Ortiz 2018 [48] | (i) and 418 (c)                          |                   | Age: 51.4 (SD 12.1) (i) and 52.3 (SD 12.0) (c)<br>BMI: 28.1 (SD 5.1) (i) and 27.6 (SD 4.6) (c)      | adherence to a Mediterranean diet and increase of PA (3 months)      |      | Dropout rate above 10%.<br>No guarantee other apps on PA or diet were not used.               |
| He 2017 [49]           | CT (2 groups, 15,310)                    | China             | Sex: 40.5% (i) and 66.5% (c) woman.<br>Age: 35.1 (SD 8.5) (i) and 39.0 (SD 9.5) (c)<br>BMI: No Inf. | Effectiveness of WeChat intervention (6 months)                      | Low  | No randomization.<br>Self-reported outcomes.<br>High dropout rates in the intervention group. |
| Mummah 2017 [50]       | RCT (2 groups, 135)                      | The United States | Sex: 62.2% women<br>Age: 39.4 (SD 6.7) (i) 40.3 (SD 5.8) (c)<br>BMI: 28-40                          | Efficacy of Vegethon app to increase vegetable consumption (5 weeks) | High | No relevant limitations.                                                                      |
| Mao 2017 [51]          | CT (2 groups, 1012, 763 (i) and 249 (c)) | The United States | Sex: 66.7% women<br>Age: 44.6 (SD 11.3)<br>BMI: 33.5 (SD 0.2)                                       | Efficacy of health coaching service (Vida Health app) + wireless     | Low  | No randomization.<br>Retrospective data.<br>Self-reported data.                               |



|                    |                     |         |                                                                                                  |                                                                                                                            |          |                                                                         |
|--------------------|---------------------|---------|--------------------------------------------------------------------------------------------------|----------------------------------------------------------------------------------------------------------------------------|----------|-------------------------------------------------------------------------|
|                    |                     |         |                                                                                                  | scale, pedometer, and blood pressure management (5 months)                                                                 |          | Lack of a true control group.                                           |
| Hurkmans 2018 [52] | RCT (4 groups, 102) | Belgium | Sex: 84% (i) and 75% (c) women<br>Age: 44 (SD 12.4) (i) and 45 (SD 10.2) (c)<br>BMI: 32 (SD 2.0) | Efficacy in weight loss and other outcomes of an app intervention, alone or combined with face-to-face coaching (3 months) | Moderate | Small sample. Possible bias in data collection. Self-reported outcomes. |

<sup>a</sup>CT: nonrandomized controlled trial.

<sup>b</sup>No Inf: no information available.

<sup>c</sup>(i): intervention group.

<sup>d</sup>(c): control group.

<sup>e</sup>BMI: body mass index (always measured as kg/m<sup>2</sup>).

<sup>f</sup>RCT: randomized control trial.

<sup>g</sup>PA: physical activity.

<sup>h</sup>HbA<sub>1c</sub>: hemoglobin A<sub>1c</sub>.
