# Supplementary material for: Assessment of the Efficacy, Safety, and Effectiveness of Weight Control and Obesity Management Mobile Health Interventions: Systematic Review
Source: PubMed Central journal article supplement (PMC6913727; doi:10.2196/12612), 2019-10-25
Supplement: mhealth_v7i10e12612_app4.pdf [file mhealth_v7i10e12612_app4.pdf]

**Multimedia Appendix 4: Elements included in the mobile health interventions of the selected studies.**

| Mobile health intervention  | Components                                     | Elements included |                 |               |          |              |               |               |
|-----------------------------|------------------------------------------------|-------------------|-----------------|---------------|----------|--------------|---------------|---------------|
|                             |                                                | Education         | Self-monitoring | Setting goals | Feedback | Gamification | Peers network | Entertainment |
| SmartDiet [23]              | MyPage app<br>Diet Game app                    | — <sup>a</sup>    | +               | +             | —        | +            | —             | —             |
| Health-E-call [25]          | Daily Burn app + Health-E-call app             | +                 | +               | +             | +        | —            | —             | —             |
| My Meal Mate [24]           | Stand-alone app                                | —                 | +               | +             | +        | —            | —             | —             |
| B-mobile [26]               | Aka app + armband sensor                       | —                 | —               | +             | +        | —            | —             | —             |
| Stand-alone app [27]        | Stand-alone app                                | —                 | +               | +             | +        | —            | —             | —             |
| Multicomponent [36]         | App<br>Face-to-face sessions<br>Phone meetings | —                 | +               | +             | +        | —            | +             | +             |
| Loose It [32]               | Stand-alone app                                | —                 | +               | +             | +        | —            | —             | —             |
| Multicomponent [29]         | Fitbit<br>App<br>Website                       | —                 | +               | +             | +        | —            | —             | —             |
| Diabetes Prevention Program | App<br>Pedometer                               | +                 | +               | —             | +        | —            | —             | +             |

|                                             |                                                                  |   |   |   |   |   |   |   |
|---------------------------------------------|------------------------------------------------------------------|---|---|---|---|---|---|---|
| (mDPP)<br>[30]                              | Face-to-face sessions                                            |   |   |   |   |   |   |   |
| mActive<br>[31]                             | Fitbug app<br>Armband sensor                                     | — | — | + | + | — | — | — |
| TXT2BFiT<br>[34,35]                         | eVIP, ePass,<br>eSIYP apps<br>My Message<br>Media<br>Website     | + | + | + | + | — | + | — |
| eBalance<br>[37]                            | Stand-alone app                                                  | — | + | — | + | — | — | — |
| Cell phone intervention for you (CITY) [39] | Stand-alone app<br>Personal coach                                | — | — | + | — | — | + | — |
| SmartCare<br>[33]                           | App<br>Body composition monitors<br>Pedometers                   | + | + | + | + | — | — | — |
| Alive-PD<br>[28]                            | App<br>Web<br>Email<br>Interactive voice response<br>Phone calls | + | + | + | + | + | + | + |
| Balance It<br>[38]                          | Stand-alone app                                                  | + | — | + | + | + | — | + |
| Multicomponent [40]                         | Fitbit<br>App<br>Facebook                                        | — | + | + | + | — | + | — |

|                                  |                                                                               |   |   |   |   |   |   |   |
|----------------------------------|-------------------------------------------------------------------------------|---|---|---|---|---|---|---|
| Be Positive<br>Be Health<br>[41] | Website<br>App                                                                | — | + | + | + | — | + | + |
| Daily Burn<br>[42]               | Stand-alone<br>app                                                            | + | + | + | + | — | — | — |
| With U [43]                      | App<br>Facebook                                                               | — | — | + | — | — | + | — |
| Noom [44]                        | App<br>Personal<br>Health Coach                                               | + | + | — | + | + | — | — |
| Multicompo<br>nent [45]          | Fitbit Aria<br>Scale<br>Fitbit Flex<br>Tele and<br>face-to-face<br>counseling | + | — | — | + | — | — | — |
| YouPlus<br>Health [46]           | Stand-alone<br>app                                                            | + | + | — | + | — | — | — |
| Evident II<br>[47,48]            | App<br>Pedometer                                                              | — | + | — | + | — | — | — |
| Vegethon<br>[50]                 | Stand-alone<br>app                                                            | — | — | + | + | — | + | — |
| Vida Health<br>[51]              | App<br>Scale<br>Pedometer<br>Blood<br>pressure cuff                           | + | — | — | + | — | — | — |
| We Chat<br>[49]                  | Stand-alone<br>app                                                            | + | — | — | + | + | + | — |
| B-slim [52]                      | Stand-alone<br>app                                                            | + | + | + | — | — | + | — |

<sup>a</sup>—: data not applicable
