# Supplementary material for: Assessment of the Efficacy, Safety, and Effectiveness of Weight Control and Obesity Management Mobile Health Interventions: Systematic Review
Source: PubMed Central journal article supplement (PMC6913727; doi:10.2196/12612), 2019-10-25
Supplement: mhealth_v7i10e12612_app5.pdf [file mhealth_v7i10e12612_app5.pdf]

**Multimedia Appendix 5: Output tools and results from the selected studies.**

| Output                         | Reference             | Tool                                                                   | Result                                                                                                                                                                                                                                                                                                                                                                                     |
|--------------------------------|-----------------------|------------------------------------------------------------------------|--------------------------------------------------------------------------------------------------------------------------------------------------------------------------------------------------------------------------------------------------------------------------------------------------------------------------------------------------------------------------------------------|
| Acceptability                  | Carter 2013 [24]      | Evaluation survey                                                      | At 6 months, 63.2% of smartphone participants were satisfied or very satisfied compared with 50.0% in the diary group and 42.1% in the website group ( $P=.05$ ).                                                                                                                                                                                                                          |
|                                | Finkelstein 2015 [29] | Focus group                                                            | A majority of the participants expressed high acceptance of the mobile app and indicated willingness to use it in the future.                                                                                                                                                                                                                                                              |
|                                | Hutchesson 2016 [41]  | Evaluation survey<br>Objective data tracking participants' performance | <ul style="list-style-type: none"> <li>• Mean satisfaction was 3.4 (maximum of 5).</li> <li>• There were 22 posts to the discussion forum.</li> <li>• One-third of participants (n=6) added at least 1 post to the discussion forum.</li> </ul>                                                                                                                                            |
|                                | Quintiliani 2016 [45] | Open questions survey                                                  | <ul style="list-style-type: none"> <li>• Nine out of 10 participants responded that it is <i>very likely</i> that they would participate again or recommend the program to others.</li> <li>• However, 7 out of 10 participants responded that it is <i>somewhat unlikely</i> or <i>not at all likely</i> that they would participate again if they had to pay for the program.</li> </ul> |
| Usability/adherence/engagement | Lee 2010 [23]         | Data tracking                                                          | The mean number of transmissions was 12.4 per patient.                                                                                                                                                                                                                                                                                                                                     |
|                                | Carter 2013 [24]      | Intervention use                                                       | Intervention usage was highest in the smartphone group: mean of 92 (SD 67) days completed compared with 29 (SD 39) days in the diary group and 35 (SD 44) days in the website group.                                                                                                                                                                                                       |
|                                | Thomas 2013 [25]      | Data tracking                                                          | Participants adhered to self-monitoring at 90.8 (3.3%) at 12 weeks and 84.9 (4.0%) at 24 weeks. Participants were considered to be adhering if recording daily body weight and at least 3 meals or food intake per day.                                                                                                                                                                    |

|  |                          |                                                                                      |                                                                                                                                                                                                                                                                                                                                                                                                                                                                        |
|--|--------------------------|--------------------------------------------------------------------------------------|------------------------------------------------------------------------------------------------------------------------------------------------------------------------------------------------------------------------------------------------------------------------------------------------------------------------------------------------------------------------------------------------------------------------------------------------------------------------|
|  | Nollen<br>2014 [27]      | Time and date<br>tracking                                                            | Girls used the program on 63% of days, responded to 42% of prompts, and earned an average of 23.9 songs.                                                                                                                                                                                                                                                                                                                                                               |
|  | McCarroll<br>2015 [32]   | Data tracking                                                                        | Patients who failed to log more than 3 days in a row: 30% (15 participants).                                                                                                                                                                                                                                                                                                                                                                                           |
|  | Spook 2015<br>[38]       | Data tracking                                                                        | Only 27.6% of the participants used the intervention.                                                                                                                                                                                                                                                                                                                                                                                                                  |
|  | Partridge<br>2016 [35]   | Semistructured<br>telephone<br>interviews<br><br>Online surveys<br><br>Data tracking | <ul style="list-style-type: none"> <li>• Smartphone apps, resources, and community blog used by less than 25% of participants.</li> <li>• Coaching calls, text messages, and emails were described as helpful to achieving goals.</li> </ul>                                                                                                                                                                                                                           |
|  | Safran 2015<br>[37]      | Data tracking<br><br>Google<br>analytics                                             | <ul style="list-style-type: none"> <li>• The mean frequency of use was 2.7 (SD 1.9) days a week (95% CI 2.2-3.2). The average period of use was 7.8 (SD 4.3) weeks. <ul style="list-style-type: none"> <li>• Self-monitoring declined over the study period. At the end of 14 weeks, 27% of users were still active on the app. The average duration of visits was 7.5 (SD 0.9) min and the average number of visits per page was 6.2 (SD 0.6).</li> </ul> </li> </ul> |
|  | Svetkey<br>2015 [39]     | Data tracking                                                                        | Participants interacted with the study app an average of 4.6 times/day in the first 6 months and 0.7 times/day in the final year.                                                                                                                                                                                                                                                                                                                                      |
|  | Block 2015<br>[28]       | Data tracking                                                                        | Interaction was a median of 17 of the 24 weeks (interquartile range 14). In all, 87.1% of the participants interacted with the program in 4 or more of the 24 weeks.                                                                                                                                                                                                                                                                                                   |
|  | Aschbrenner<br>2016 [40] | Usage of Fitbit<br>and private<br>Facebook<br>group                                  | All (100%) of the participants used the Fitbit and 76% used the private Facebook group.                                                                                                                                                                                                                                                                                                                                                                                |
|  | Jensen<br>2016 [42]      | Self-<br>monitoring                                                                  | <ul style="list-style-type: none"> <li>• On average, participants monitored at least 2 meals on 48.3% of days during the in-person intervention (12 weeks).</li> </ul>                                                                                                                                                                                                                                                                                                 |

|              |                        |                                       |                                                                                                                                                                                                                                                                                                                                                                 |
|--------------|------------------------|---------------------------------------|-----------------------------------------------------------------------------------------------------------------------------------------------------------------------------------------------------------------------------------------------------------------------------------------------------------------------------------------------------------------|
|              |                        |                                       | <ul style="list-style-type: none"> <li>• Participants monitored at least 2 meals on 16.6% of the available days during the electronic-only intervention period (12 weeks).</li> </ul>                                                                                                                                                                           |
|              | Lee 2016 [43]          | System Usability Scale [55]           | 63 out of 100 points indicated slightly low usability (threshold is 68).                                                                                                                                                                                                                                                                                        |
|              | Michaelides 2016 [44]  | Data tracking                         | <ul style="list-style-type: none"> <li>• Meals per week logged 15.3 (SD 5.1).</li> <li>• Minutes per week of exercise 141.6 (SD 112.9).</li> <li>• Number of group comments per week 2.1 (SD 1.8).</li> </ul>                                                                                                                                                   |
|              | Quintiliani 2016 [45]  | Data tracking                         | Mean number of responses was 60 (SD 13), for responding to text messages; 64 (SD 7) for recording a step measurement; 45 (SD 24) for recording a weight measurement; and 43 (SD 19) for recording a sleep measurement, out of a possible 70.                                                                                                                    |
|              | Willey 2016 [46]       | Data tracking                         | <ul style="list-style-type: none"> <li>• 100% completed tutorials.</li> <li>• Number of questions asked 16-276 in discussion.</li> <li>• Number of questions answered 100-276 in forums.</li> <li>• Mean weekly opens: 5.1-18.4.</li> </ul>                                                                                                                     |
|              | Garcia-Ortiz 2018 [48] | Number of recorded days on the device | <ul style="list-style-type: none"> <li>• 100% completed tutorials.</li> <li>• The median use of the app was 67 days.</li> <li>• 56.8% participants in the intervention group had high app adherence (more than 60 days).</li> <li>• Participants with low adherence were younger (49.5 vs 52.9 years), and there was a higher proportion of smokers.</li> </ul> |
| Satisfaction | Thomas 2013 [25]       | Likert scale                          | All participants endorsed the maximum rating for satisfaction.                                                                                                                                                                                                                                                                                                  |
|              | Oh 2015 [33]           | Likert scale                          | On a 1-5 scale, satisfaction was 3.92 (SD 0.85).                                                                                                                                                                                                                                                                                                                |
|              | Pretlow 2015 [36]      | Likert scale                          | On a 1-5 scale, satisfaction was 3.11 (SD 0.15).                                                                                                                                                                                                                                                                                                                |

|                           |                       |                                                                                   |                                                                                                                                                                                                                                                                                                                                                                                                                                                                                                      |
|---------------------------|-----------------------|-----------------------------------------------------------------------------------|------------------------------------------------------------------------------------------------------------------------------------------------------------------------------------------------------------------------------------------------------------------------------------------------------------------------------------------------------------------------------------------------------------------------------------------------------------------------------------------------------|
|                           | Safran 2015 [37]      | Ad hoc questionnaire based on Shahar et al [56]                                   | <ul style="list-style-type: none"> <li>• Moderate to very high recommendation for the app 93%.</li> <li>• Satisfaction on a scale of 1-10 was 7.3 (SD 1.9).</li> </ul>                                                                                                                                                                                                                                                                                                                               |
|                           | Jensen 2016 [42]      | Client satisfaction standardized questionnaire [57]<br>Semistructured interviews. | <ul style="list-style-type: none"> <li>• Score: 20.3 out of 22.</li> <li>• Most described the intervention favorably (86%), reporting that the intervention <i>worked well</i> or was <i>very helpful</i>.</li> <li>• Participants enjoyed learning about nutrition and exercise (33%) and being able to meet with an expert to have their questions answered (20%).</li> <li>• Half of the participants found the Daily Burn app to be <i>tedious</i> and <i>difficult to use</i> (53%).</li> </ul> |
|                           | Lee 2016 [43]         | Lim and Kang scale [58]                                                           | Before/after 48.7/54.2 points ( $P<.01$ ).                                                                                                                                                                                                                                                                                                                                                                                                                                                           |
|                           | Mao 2017 [51]         | Rating of the App (out of 10)                                                     | Only 43.6% of participants in the intervention group rated their satisfaction, score=9.8 (SD 0.7).                                                                                                                                                                                                                                                                                                                                                                                                   |
| Motivation to weight loss | Bond 2014 [26]        | Likert scale                                                                      | 90% of participants endorsed either a 4 ( $n=11$ ) or 5 ( $n=17$ ) indicating that the app intervention significantly increased their motivation.                                                                                                                                                                                                                                                                                                                                                    |
|                           | Lee 2016 [43]         | Jung [59] and Yu [60] scales                                                      | A score of 15.4 (SD 1.4) out of a possible 20.                                                                                                                                                                                                                                                                                                                                                                                                                                                       |
| Intention to continue     | Safran 2015 [37]      | Self-report questionnaire based on Parmenter and Wardle [61]                      | Control group: no significant change ( $P=.16$ ) but in the app group, from 76 (SD 7.5) to 79 (SD 8.7) at the end of the study ( $P=.04$ ).                                                                                                                                                                                                                                                                                                                                                          |
| Perceived support         | Aschbrenner 2016 [40] | Social Provisions Scale [62]                                                      | Weight loss significantly associated with perceived peer-group support ( $r=0.59$ , $P=.02$ ).                                                                                                                                                                                                                                                                                                                                                                                                       |

|  |                          |                                     |                                                                                                                                                      |
|--|--------------------------|-------------------------------------|------------------------------------------------------------------------------------------------------------------------------------------------------|
|  | Quintiliani<br>2016 [45] | Ad hoc<br>Perceived<br>Stress Scale | Reductions in fatigue, loss of control in eating, and<br>perceived stress of $-1.8$ (SD 0.8), $-0.5$ (SD 0.7), and<br>$-0.4$ (SD 3.3), respectively. |
|--|--------------------------|-------------------------------------|------------------------------------------------------------------------------------------------------------------------------------------------------|
