# Supplementary material for: Assessment of the Efficacy, Safety, and Effectiveness of Weight Control and Obesity Management Mobile Health Interventions: Systematic Review
Source: PubMed Central journal article supplement (PMC6913727; doi:10.2196/12612), 2019-10-25
Supplement: mhealth_v7i10e12612_app6.pdf [file mhealth_v7i10e12612_app6.pdf]

**Multimedia Appendix 6: Main outcome results from the selected studies.**

| Outcome                            | Reference         | Tool                                                                                                        | Result                                                                                                                                                                                                                                                                                                                                                                                                                                                                                                            |
|------------------------------------|-------------------|-------------------------------------------------------------------------------------------------------------|-------------------------------------------------------------------------------------------------------------------------------------------------------------------------------------------------------------------------------------------------------------------------------------------------------------------------------------------------------------------------------------------------------------------------------------------------------------------------------------------------------------------|
| Weight reduction /BMI <sup>a</sup> | Lee 2010 [23]     | Bioelectrical impedance analysis with InBody 720                                                            | Reduction in weight in the intervention group 1.9 (ss) <sup>b</sup> and 0.5 kg in control group (ns). <sup>c</sup>                                                                                                                                                                                                                                                                                                                                                                                                |
|                                    | Carter 2013 [24]  | Weight by Watchers 8958U Body Analyser Scale portable.<br>Height portable stadiometer to the nearest 0.1 cm | <ul style="list-style-type: none"> <li>• Weight reduction: ITT<sup>d</sup> mean in app group 4.6 kg (ss); in the diary group 2.9 kg (ss); and in the website group 1.3 kg (ns).</li> <li>• BMI<sup>d</sup> ITT mean change at 6 months <math>-1.6 \text{ kg/m}^2</math> (ss) in the app group; <math>-1.0 \text{ kg/m}^2</math> (ss) in the diary group; and <math>-0.5 \text{ kg/m}^2</math> (ns). Difference (<math>P=.004</math>).</li> <li>• Follow-up weight between the groups at 6 months (ss).</li> </ul> |
|                                    | Thomas 2013 [25]  | Digital scale and stadiometer.                                                                              | Weight reduction: 10.9 (1.1) kg. <sup>e</sup>                                                                                                                                                                                                                                                                                                                                                                                                                                                                     |
|                                    | Block 2015 [28]   | Nonspecified                                                                                                | <ul style="list-style-type: none"> <li>• Weight loss: intervention group 3.26 (95% CI <math>-3.26</math> to <math>-3.25</math>) kg; control group 1.26 (95% CI <math>-1.27</math> to <math>-1.26</math>) kg (<math>P&lt;.001</math>).</li> <li>• BMI loss: intervention group 1.05 (95% CI <math>-1.06</math> to <math>-1.05</math>); control group 0.9 (95% CI <math>-0.39</math> to <math>-0.38</math>) (<math>P&lt;.001</math>).</li> </ul>                                                                    |
|                                    | Fukuoka 2015 [30] | Tanita WB-110 digital electronic scale and conventional stadiometer                                         | • Intervention group lost an average of 6.2 kg between baseline and 5-month follow-up compared with                                                                                                                                                                                                                                                                                                                                                                                                               |

|  |                     |                                                                                                                       |                                                                                                                                                                                                                                                                                                                                                                       |
|--|---------------------|-----------------------------------------------------------------------------------------------------------------------|-----------------------------------------------------------------------------------------------------------------------------------------------------------------------------------------------------------------------------------------------------------------------------------------------------------------------------------------------------------------------|
|  |                     |                                                                                                                       | <p>control group which gained 0.3 kg (<math>P&lt;.001</math>).</p> <ul style="list-style-type: none"> <li>• Mean BMI decreased in the intervention group with almost no change among controls (<math>P&lt;.001</math>).</li> </ul>                                                                                                                                    |
|  | McCarroll 2015 [32] | 499KI. Health O Meter Professional Digital Column Scale                                                               | BMI decreased from 34.9 (8.7) kg/m <sup>2</sup> to 33.9 (8.4) kg/m <sup>2</sup> ( $P<.001$ ). <sup>e</sup>                                                                                                                                                                                                                                                            |
|  | Oh 2015 [33]        | Bioelectrical impedance analysis with InBody U20                                                                      | <ul style="list-style-type: none"> <li>• Weight reduction was 2.21 (3.60) kg in the intervention group and 0.77 (2.77) kg in the control group (<math>P&lt;.001</math>).<sup>e</sup></li> <li>• BMI reduction was 0.86 (1.32) kg/m<sup>2</sup> and 0.33 (1.05) kg/m<sup>2</sup> (<math>P&lt;.001</math>), respectively.<sup>e</sup></li> </ul>                        |
|  | Pretlow 2015 [36]   | Health-O-meter stadiometer (Continental Scale Corp.) and self-calibrating 500-pound capacity Faribanks digital scale. | <ul style="list-style-type: none"> <li>• Males 13.3% over BMI.</li> <li>• Females 3.8% over BMI.</li> </ul>                                                                                                                                                                                                                                                           |
|  | Safran 2015 [37]    | Portable digital scale (Beurer GmbH & Co. KG).                                                                        | <ul style="list-style-type: none"> <li>• The app users lost more weight compared to the control group: -1.4 (0.4) kg versus -0.13 (0.4) kg (<math>P=.03</math>).<sup>e</sup></li> <li>• The mean BMI change was -0.5 (0.1) kg/m<sup>2</sup> in the app group, but only -0.03 (0.1) kg/m<sup>2</sup> in the control group (<math>P=.03</math>).<sup>e</sup></li> </ul> |
|  | Svetkey 2015 [39]   | Weight: in high-quality calibrated digital scale.                                                                     | <ul style="list-style-type: none"> <li>• All groups lost weight at 6, 12, and 24 months. No significant differences between the 3 groups at 24 months.</li> <li>• Personal coach greatest mean weight loss at 6 (-3.1 kg) and 12 months</li> </ul>                                                                                                                    |

|                       |                                                                                                                             |  |                                                                                                                                                                                                                                                                        |
|-----------------------|-----------------------------------------------------------------------------------------------------------------------------|--|------------------------------------------------------------------------------------------------------------------------------------------------------------------------------------------------------------------------------------------------------------------------|
|                       |                                                                                                                             |  | (-2.1 kg) than app (6 months=-2.2 kg, 12 months=-2.1 kg) ( $P<.05$ ).                                                                                                                                                                                                  |
| Aschbrenner 2016 [40] | Weight loss calculated as the proportion that achieved clinically significant reduction of $\geq 5\%$ from baseline weight. |  | <ul style="list-style-type: none"> <li>• Weight loss: 72% participants lost weight, 28% achieving clinically significant weight loss.</li> <li>• Weight loss of 7.8 (12) kg.<sup>e</sup></li> <li>• BMI decrease of 1.3 (2.0) kg/m<sup>2</sup>.<sup>e</sup></li> </ul> |
| Hutchesson 2016 [41]  | Bioelectrical impedance analysis with InBody 720                                                                            |  | Reduction in weight in 1.5 (2.4) kg; ( $P=.02$ ). <sup>e</sup>                                                                                                                                                                                                         |
| Jensen 2016 [42]      | Weight with a digital scale (Seca 869) and height using a portable stadiometer (Seca 217)                                   |  | <ul style="list-style-type: none"> <li>• Significant reduction in weight during face-to-face + app intervention (<math>P=.04</math>).</li> <li>• Back to initial weight after only online intervention.</li> </ul>                                                     |
| Lee 2016 [43]         | Bioelectrical impedance analysis with InBody 720                                                                            |  | Weight measures: Before: 80.2 kg, After 79.3 kg ( $P<.001$ ).                                                                                                                                                                                                          |
| Michaelides 2016 [44] | No information                                                                                                              |  | <ul style="list-style-type: none"> <li>• Weight loss at 16 and 24 weeks was significant.</li> <li>• A rate of 64% of completers losing over 5% body weight.</li> </ul>                                                                                                 |
| Partridge 2016 [35]   | Self-reported data<br>Standardized protocol for weight and height [63]                                                      |  | <ul style="list-style-type: none"> <li>• No difference between self-reported or measured data.</li> <li>• Weight loss: 2.2 kg (0.8-3.6), <math>P=.005</math>.</li> <li>• BMI loss: 0.5 13 kg/m<sup>2</sup> (0.1-1.0), <math>P=.02</math>.</li> </ul>                   |
| Quintiliani 2016 [45] | Scale not specified                                                                                                         |  | Mean weight reduction in 1.5 (3.5) kg. <sup>e</sup>                                                                                                                                                                                                                    |
| Willey 2016 [46]      | Single calibrated scale at physician's office                                                                               |  | Reduction of 6.1 kg representing 7.3% of baseline, $P=.005$ .                                                                                                                                                                                                          |

|                               |                        |                                                                 |                                                                                                                                                                                                                                                                                                                                                                                                                                                                                                          |
|-------------------------------|------------------------|-----------------------------------------------------------------|----------------------------------------------------------------------------------------------------------------------------------------------------------------------------------------------------------------------------------------------------------------------------------------------------------------------------------------------------------------------------------------------------------------------------------------------------------------------------------------------------------|
|                               | Gomez-Marcos 2017 [47] | Seca 770 scale, Seca 222 height rod.                            | At 3 months, there were no significant differences in baseline measurements in the overall population.                                                                                                                                                                                                                                                                                                                                                                                                   |
|                               | He 2017 [49]           | Auto-reported weight                                            | No significant decrease of weights between groups: control group 1.78 (2.96) kg and intervention group 2.09 (3.43) kg. <sup>e</sup>                                                                                                                                                                                                                                                                                                                                                                      |
|                               | Mao 2017 [51]          | Weight via a Bluetooth scale. Some participants self-enter data | Mean weight loss at 4 months in intervention group: -3.2 (0.2) kg ( $P<.001$ ). <sup>e</sup>                                                                                                                                                                                                                                                                                                                                                                                                             |
|                               | Hurkmans 2018 [52]     | Scale not specified                                             | <ul style="list-style-type: none"> <li>• Significantly more participants in 3 intervention groups lost at least 5% of their body weight compared with the control group.</li> <li>• More participants in the combined group lost 5% or more compared with the app group (19%, <math>P=.06</math>).</li> <li>• In the conventional group, app group, and combined group, BMI decreased significantly (<math>P&lt;.01</math>, <math>P&lt;.01</math>, and <math>P&lt;.001</math>, respectively).</li> </ul> |
| Fat mass reduction            | Lee 2010 [23]          | Bioelectrical impedance analysis with InBody 720                | Reduction of fat mass in 1.2 kg (ss) (i) and 0.5 kg (ns) (c).                                                                                                                                                                                                                                                                                                                                                                                                                                            |
|                               | Oh 2015 [33]           | Bioelectrical impedance analysis with InBody U20                | Statistically significant reduction, $P=.001$ .                                                                                                                                                                                                                                                                                                                                                                                                                                                          |
|                               | Lee 2016 [43]          | Bioelectrical impedance analysis with InBody 720                | Before: 31.34%, after 30.87% (ns).                                                                                                                                                                                                                                                                                                                                                                                                                                                                       |
| Waist circumference reduction | Block 2015 [28]        | No information                                                  | Mean reduction intervention group 4.56 (95% CI -4.69 to -4.43); control group 2.22 (95% CI -2.36 to -2.09) ( $P<.001$ ).                                                                                                                                                                                                                                                                                                                                                                                 |

|                               |                            |                                                                                                       |                                                                                                                                                                                                                                                                                   |
|-------------------------------|----------------------------|-------------------------------------------------------------------------------------------------------|-----------------------------------------------------------------------------------------------------------------------------------------------------------------------------------------------------------------------------------------------------------------------------------|
|                               | McCarroll<br>2015 [32]     | Spring-loaded tape measure (Gulick Tape Measure, Perform Better)                                      | Before: 108.1 (SD 14.9) cm; after intervention: 103.7 (SD 15.1) cm. ( $P<.001$ ).                                                                                                                                                                                                 |
|                               | Safran<br>2015 [37]        | Measured on the navel                                                                                 | No changes between intervention and control group were measured.                                                                                                                                                                                                                  |
|                               | Hutchesson<br>2016<br>[41] | A 0.1 cm using a nonextensible steel tape measure                                                     | Reduction in waist circumference 0.7 (1.4) cm ( $P=.04$ ). <sup>e</sup>                                                                                                                                                                                                           |
|                               | Lee 2016<br>[43]           | Bioelectrical impedance analysis with InBody 720                                                      | <ul style="list-style-type: none"> <li>• Waist circumference: before: 33.5 cm, after 33.3 cm (<math>P&lt;.05</math>).</li> <li>• Waist-hip ratio: before: 0.91, after 0.90. (ns).</li> </ul>                                                                                      |
|                               | Willey<br>2016 [46]        | Physician's office                                                                                    | Reduction by 7.2 cm or 6.6% from baseline, $P=.005$ .                                                                                                                                                                                                                             |
|                               | He 2017<br>[49]            | Auto-reported measure                                                                                 | No significant decrease: control group 2.39 (3.91) and intervention group 2.74 (4.48) cm. <sup>e</sup>                                                                                                                                                                            |
|                               | Hurkmans<br>2018 [52]      | Inelastic tape perpendicularly to the long axis of the body while the subject stood balanced on feet. | Within the conventional group, app group, and combined group, a decrease in metabolic risk factors was found, but this change was not significant ( $P=.12$ , $P=.15$ , and $P=.23$ ). It does not specify which other outcomes are considered together with waist circumference. |
| Hip circumference             | Fukuoka<br>2015 [30]       | Standard protocol (not specified)                                                                     | The intervention group had greater reductions in hip circumference ( $P<.001$ ).                                                                                                                                                                                                  |
| Change in physical activities | Bond<br>2014 [26]          | SenseWear Mini Armband monitor                                                                        | Percent time spent in both light ( $P<.05$ ) and moderate-to-vigorous ( $P<.01$ ) PA <sup>f</sup> was significantly increased compared with baseline.                                                                                                                             |

|                              |                                                       |                                                                                                                                                                                                                                                     |
|------------------------------|-------------------------------------------------------|-----------------------------------------------------------------------------------------------------------------------------------------------------------------------------------------------------------------------------------------------------|
| Finkelstein 2015 [29]        | Step count measured via Fitbit                        | <ul style="list-style-type: none"> <li>• Higher average daily number of steps in the intervention group (ns).</li> <li>• Inactivity lower in the intervention group (25%) compared with the control group (30%) (<math>P&lt;.02</math>).</li> </ul> |
| Fukuoka 2015 [30]            | Omron Active Style Pro HJA-350IT pedometer            | Intervention participants increased their daily step count by a mean of 2551 (4712) steps (a 38% increase) compared with a mean decrease of 734 (3308) steps (an 11% decrease) among controls ( $P=.02$ ).                                          |
| Martin 2015 [31]             | Data tracking by accelerometer                        | Control participants attained a mean of 616 fewer steps/day (6% decrease). Intervention participants increased their steps/day by a mean of 408 (4% increase).                                                                                      |
| McCarroll 2015 [32]          | Logs from the app health care provider interface      | PA increased from 77.5185 (156.6) kcal expended and 22.7 (44.0) min to 1971.8 (1105.4) kcal and 182.3 (196.6) min ( $P=.001$ ). <sup>e</sup>                                                                                                        |
| Oh 2015 [33]                 | IPAQ <sup>g</sup> -questionnaire [64]<br>MET tracking | No significant differences.                                                                                                                                                                                                                         |
| Partridge 2015, 2016 [34,35] | IPAQ-SF <sup>h</sup> [65]                             | Number of PA days increased more in the intervention group ( $P=.003$ ) compared with the control group ( $P=.02$ ).                                                                                                                                |
| Safran 2015 [37]             | Questionnaire based on IPAQ [64]                      | The mean change in the weekly duration of PA was increased by 63 (20.8) min in the app group and reduced by 30 (-27.5) min in the control group ( $P=.02$ ). <sup>e</sup>                                                                           |

|                            |                           |                                                                                   |                                                                                                                                                                                                                              |
|----------------------------|---------------------------|-----------------------------------------------------------------------------------|------------------------------------------------------------------------------------------------------------------------------------------------------------------------------------------------------------------------------|
|                            | Spook<br>2015 [38]        | Ad hoc questionnaire                                                              | No differences between intervention and control groups.                                                                                                                                                                      |
|                            | Svetkey<br>2015 [39]      | Paffenbarger questionnaire [66]                                                   | No significant changes in PA performance (kcal/week) in any of the 3 groups: control, personal coach, or cellular phone interventions.                                                                                       |
|                            | Aschbrenner<br>2016 [40]  | Cardiorespiratory fitness with the 6-MWT <sup>i</sup> [67]                        | <ul style="list-style-type: none"> <li>• Clinically significant improvements in cardiovascular fitness defined as &gt;50 m increase on the 6-MWT (17%).</li> <li>• Overall change in fitness was not significant.</li> </ul> |
|                            | Quintiliani<br>2016 [45]  | IPAQ [64]                                                                         | Moderate and vigorous PA increased 545 and 792, respectively, MET <sup>j</sup> minutes per week (ns).                                                                                                                        |
|                            | Garcia-Ortiz<br>2018 [48] | ActiGraph GT3X accelerometer<br>7-day PA Record<br>Semistructured interview where | <ul style="list-style-type: none"> <li>• Decrease of PA in both groups</li> <li>• The intervention subgroup with high app adherence had better behavior than the low adherence subgroup (ss).</li> </ul>                     |
|                            | Hurkmans<br>2018 [52]     | Triaxial accelerometer (ActiGraph wGT3X-BT)                                       | <ul style="list-style-type: none"> <li>• No significant group PA time effects found.</li> </ul>                                                                                                                              |
| Changes in dietary pattern | Nollen<br>2014 [27]       | 24-hour standardized dietary record [68]                                          | <ul style="list-style-type: none"> <li>• Fruit and vegetable consumption increased (+0.9, <math>P=.08</math>).</li> <li>• Sugar-sweetened beverages consumption decreased (-0.3, <math>P=.09</math>).</li> </ul>             |
|                            | McCarroll<br>2015 [32]    | Dietary logs from the app health care provider interface.                         | No significant differences in the macronutrient categories.                                                                                                                                                                  |
|                            | Fukuoka<br>2015 [30]      | Block Food Frequency Questionnaire [61]                                           | <ul style="list-style-type: none"> <li>• Greater reduction in intake of saturated fat (<math>P=.007</math>) in the intervention group.</li> </ul>                                                                            |

|  |                                       |                                                             |                                                                                                                                                                                                                                                                                                                                                                                                                         |
|--|---------------------------------------|-------------------------------------------------------------|-------------------------------------------------------------------------------------------------------------------------------------------------------------------------------------------------------------------------------------------------------------------------------------------------------------------------------------------------------------------------------------------------------------------------|
|  |                                       |                                                             | <ul style="list-style-type: none"> <li>• Greater reductions in intake of sugar-sweetened beverages in the intervention group (<math>P=.002</math>).</li> </ul>                                                                                                                                                                                                                                                          |
|  | Partridge<br>2015,<br>2016<br>[34,35] | Questionnaires [69,70]                                      | <ul style="list-style-type: none"> <li>• Fruit and vegetable intake: nonsignificant difference.</li> <li>• Intervention participants more likely to consume greater quantities of vegetables (<math>P=.009</math>).</li> <li>• Sugar-sweetened beverage: Intervention participants consumed less (<math>P=.002</math>).</li> </ul>                                                                                      |
|  | Safran<br>2015 [37]                   | The Diet Quality Questionnaire [71]                         | <ul style="list-style-type: none"> <li>• App users improved their score significantly at the end of the study from 67 (9.8) to 71 (0.6) (<math>P&lt;.001</math>). No changes seen in the control group.<sup>e</sup></li> <li>• Success score (represents the success in maintaining healthy lifestyle) was higher among the app group (68%) compared with 36% in the control group (<math>P&lt;.001</math>).</li> </ul> |
|  | Svetkey<br>2015 [39]                  | Healthy Eating Index [72]                                   | No significant changes in any of the groups.                                                                                                                                                                                                                                                                                                                                                                            |
|  | Oh 2015<br>[33]                       | Daily meal self-tracking                                    | No significant changes in any of the groups ( $P=0.12$ ).                                                                                                                                                                                                                                                                                                                                                               |
|  | Spook<br>2015                         | Ad hoc questionnaire                                        | No differences between intervention and control groups.                                                                                                                                                                                                                                                                                                                                                                 |
|  | Quintiliani<br>2016 [45]              | PrimeScreen [73] and Beverage Questionnaires (BEVQ-15) [74] | <ul style="list-style-type: none"> <li>• Daily fruit and vegetable servings increased (ns).</li> <li>• Diet composition score increased by a mean of 6.8 (ss).</li> </ul>                                                                                                                                                                                                                                               |



|                      |                        |                                                                                                                       |                                                                                                                                                                                                                                                                                                                              |
|----------------------|------------------------|-----------------------------------------------------------------------------------------------------------------------|------------------------------------------------------------------------------------------------------------------------------------------------------------------------------------------------------------------------------------------------------------------------------------------------------------------------------|
|                      |                        |                                                                                                                       | <ul style="list-style-type: none"> <li>• Fluid ounces of sugar-sweetened beverages mean increased.</li> </ul>                                                                                                                                                                                                                |
|                      | García-Ortiz 2018 [48] | Mediterranean Diet Adherence Screener [75]                                                                            | Both groups (intervention and control) increased adherence to Mediterranean diet with no differences between them.                                                                                                                                                                                                           |
|                      | Mummah 2017 [50]       | Harvard FFQ <sup>k</sup> [76]                                                                                         | Daily vegetable consumption was significantly greater in the intervention versus control condition: 2.0 servings; $P=.04$ for FFQ.                                                                                                                                                                                           |
|                      | Hurkmans 2018 [52]     | Digital FFQ [77]                                                                                                      | All groups reduced their total energy intake; only significant changes were found within the 3 intervention groups: conventional group ( $P<.01$ ), app group ( $P<.01$ ), and combined group ( $P<.001$ ) and not in the control group ( $P=.22$ ).                                                                         |
| Emotional well-being | Pretlow 2015 [36]      | Likert scale                                                                                                          | <ul style="list-style-type: none"> <li>• Self-esteem improvement: 2.78 (0.19) baseline and 3.59 (0.17) program completion (<math>P&lt;.01</math>).<sup>e</sup></li> <li>• Less likely to turn to food when stressed: 1.93 (0.18) baseline and 3.22 (0.22) program completion (<math>P&lt;.01</math>).<sup>e</sup></li> </ul> |
|                      | McCarroll 2015 [32]    | Functional Assessment of Cancer-Therapy-General (FACT-G) [78] and Weight Efficacy Life-Style Questionnaire (WEL) [79] | No statistically significant differences in quality of life measures ( $P>.05$ ).                                                                                                                                                                                                                                            |
| Screen time          | Nollen 2014 [27]       | Questionnaire of television viewing and computer use                                                                  | No significant associations were seen between the device utilization and screen time.                                                                                                                                                                                                                                        |

|                          |                    |                                                                                  |                                                                                                                                                                                                                                                                                                                                                        |
|--------------------------|--------------------|----------------------------------------------------------------------------------|--------------------------------------------------------------------------------------------------------------------------------------------------------------------------------------------------------------------------------------------------------------------------------------------------------------------------------------------------------|
| Biochemical measurements | Fukuoka 2015 [30]  | Nondefined                                                                       | No differences at 5 months post intervention of blood levels of fasting lipids or glucose between control and intervention group.                                                                                                                                                                                                                      |
|                          | Oh 2015 [33]       | Nondefined                                                                       | No differences between the 2 groups.                                                                                                                                                                                                                                                                                                                   |
|                          | Block 2015 [28]    | Nondefined                                                                       | The ratio of TG <sup>l</sup> /HDL <sup>m</sup> reduced in intervention group (mean -0.21, 95% CI -0.30 to -.012); it was increased in the control group (mean 0.21, 95% CI 0.12-0.29) ( <i>P</i> =.04).                                                                                                                                                |
|                          | Willey 2016 [46]   | Nondefined                                                                       | <ul style="list-style-type: none"> <li>• HDL levels increased 4.0 mg/dL (<i>P</i>=.04) and trend toward a reduction in total cholesterol of 10.5 mg/dL (<i>P</i>=.07) and triglycerides of 27 mg/dL (<i>P</i>=.07).</li> <li>• A slight and nonsignificant reduction of HbA<sub>1C</sub><sup>n</sup>; mean values reduced from 5.5 to 5.4%.</li> </ul> |
|                          | Hurkmans 2018 [52] | CardioChek Point-of-Care Self-Test device<br>Glucose BGStar measurement (Sanofi) | Within the conventional group, app group, and combined group, a decrease in metabolic risk factors was found, but this change was not significant ( <i>P</i> =.12, <i>P</i> =.15, and <i>P</i> =.23). No specific results for glucose or fasting lipids are shown.                                                                                     |
| Blood pressure           | Fukuoka 2015 [30]  | Standard protocol                                                                | The intervention group had greater reductions in blood pressure, both SBP <sup>o</sup> and DBP <sup>p</sup> ( <i>P</i> =.005).                                                                                                                                                                                                                         |
|                          | Willey 2016 [46]   | Nondefined                                                                       | SBP and DBP were significantly lower. Mean SBP and DBP fell 18.6 and 6.4 mmHg ( <i>P</i> <.01).                                                                                                                                                                                                                                                        |

|  |                  |               |                                                                                                     |
|--|------------------|---------------|-----------------------------------------------------------------------------------------------------|
|  | Mao 2017<br>[51] | Change in SBP | Mean reduction in SBP after 4 months in the intervention group 6.0 (1.6) ( $P=.002$ ). <sup>e</sup> |
|--|------------------|---------------|-----------------------------------------------------------------------------------------------------|

<sup>a</sup>ss: significant ( $P$  value not available).

<sup>b</sup>ns: nonsignificant ( $P$  value not available).

<sup>c</sup>ITT: intention to treat analysis.

<sup>d</sup>BMI: body mass index (measured as  $\text{kg}/\text{m}^2$ ).

<sup>e</sup>Values are expressed as mean (SD).

<sup>f</sup>PA: physical activity.

<sup>g</sup>IPAQ: International Physical Activity Questionnaires.

<sup>h</sup>IPAQ—SF: International Physical Activity Questionnaires—Short Form.

<sup>i</sup>6-MWT<sup>i</sup>: 6 minute walking test

<sup>j</sup>MET: metabolic equivalent of task.

<sup>k</sup>FFQ: Food Frequency Questionnaire.

<sup>l</sup>TG: triglycerides.

<sup>m</sup>HDL: high-density lipoprotein level.

<sup>n</sup>HbA<sub>1c</sub>: hemoglobin A<sub>1c</sub>.

<sup>o</sup>SBP: systolic blood pressure.

<sup>p</sup>DBP: diastolic blood pressure.
